# Supplementary material for: Genetic Characterization of a Recombinant Myxoma Virus in the Iberian Hare (Lepus granatensis)
Source: MDPI journal article supplement (doi:10.3390/v11060530), 2019-06-07
Supplement: s1 [file s1]

aLRT branch support

- >0.95
- >0.9-0.95
- >0.8-0.9

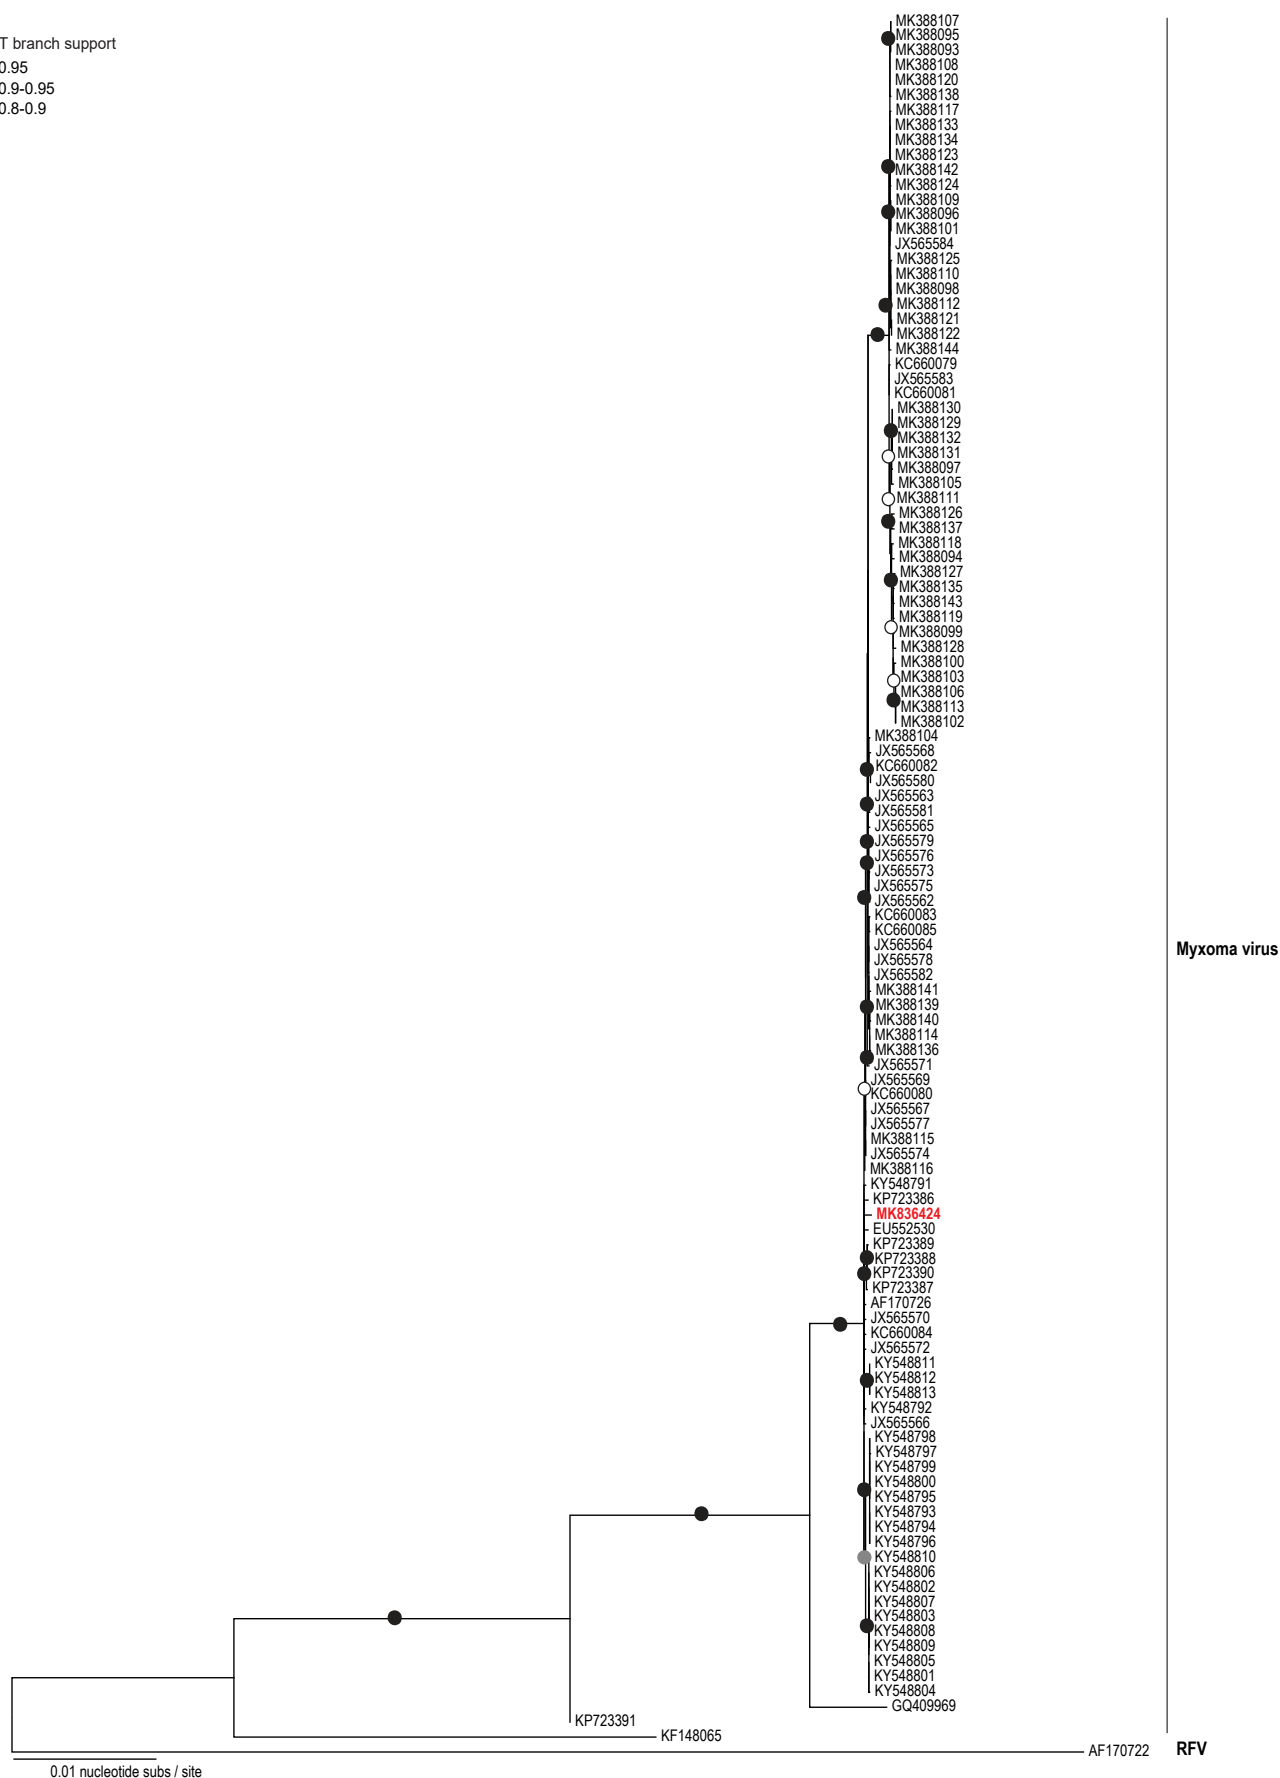

**Figure S3:** Maximum likelihood phylogenetic tree of the aligned genomes of MYXV and RFV. Branches with aLRT support 0.95 are indicated with black circles whereas branches exhibiting 0.9-0.95 and 0.8-0.9 are indicated with grey and white circles, respectively.
