# Supplementary material for: Genetic Characterization of a Recombinant Myxoma Virus in the Iberian Hare (Lepus granatensis)
Source: MDPI journal article supplement (doi:10.3390/v11060530), 2019-06-07
Supplement: s1 [file s1]

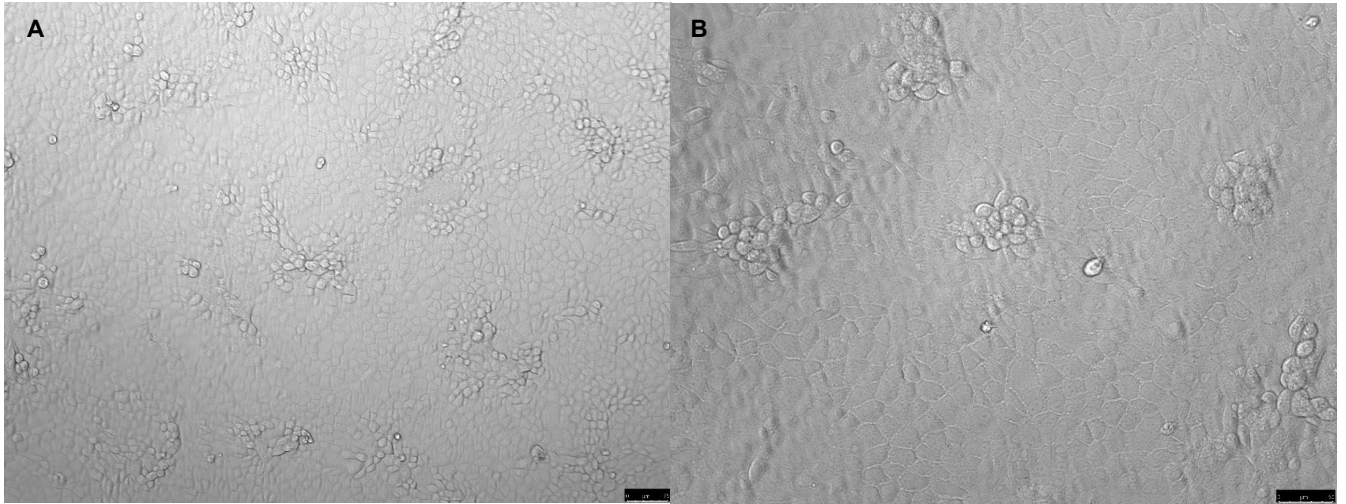

Figure S1: After performing a serial dilution of the purified MYXV-To virus, RK13 cells were infected and incubated for 48 hours at 37°C. At 2 days post infection, a typical MYXV cytopathic effect (foci formation) was visualized using a Leica DMI6000 B inverted microscope at 10x (A) and 20x (B).
