# Supplementary figures and images for: Genetic Characterization of a Recombinant Myxoma Virus in the Iberian Hare (Lepus granatensis)
Source: MDPI journal article supplement (doi:10.3390/v11060530), 2019-06-07

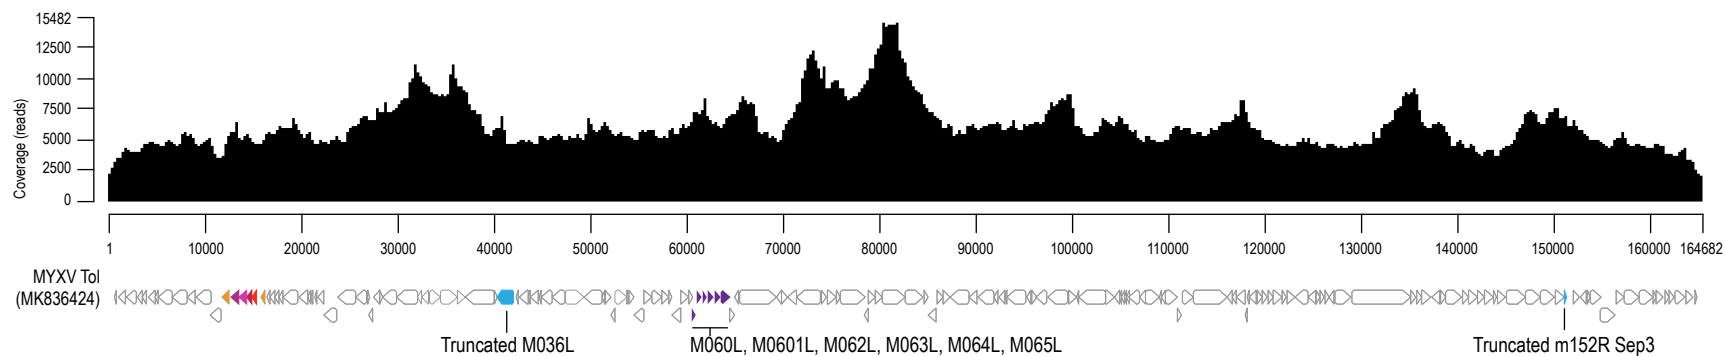

Figure S2: Posterior mapping of the Illumina sequencing read to the genome of MYXV-To using BBmap [16].

Supplement: s1 [file s1]
